# Supplementary material
Source: PubMed Central journal article supplement (PMC29786)
Supplement: nar_29_1_167__1.pdf [file nar_29_1_167__1.pdf]

## SUPPLEMENTARY MATERIAL

Table S1. Plants and algae present in the PLMiRNA database

|               | Latin name           | English name                                     | PLMiRNA code     |       |
|---------------|----------------------|--------------------------------------------------|------------------|-------|
| Viridiplantae |                      |                                                  |                  |       |
|               | <b>Bryophyta</b>     |                                                  |                  |       |
|               | Marchantiopsida      | <i>Marchantia polymorpha</i>                     | Liverwort        | M.p.  |
|               | <b>Magnoliophyta</b> |                                                  |                  |       |
|               | Magnoliopsida        | <i>Arabidopsis thaliana</i>                      | Thale cress      | A.t.  |
|               |                      | <i>Beta vulgaris</i>                             | Sugar beet       | B.v.  |
|               |                      | <i>Brassica napus</i>                            | Rape seed        | B.n.  |
|               |                      | <i>Brassica oleracea</i>                         | Cauliflower      | B.o.  |
|               |                      | <i>Glycine max</i>                               | Soybean          | G.m.  |
|               |                      | <i>Helianthus annuus</i>                         | Sunflower        | H.a.  |
|               |                      | <i>Lupinus luteus</i>                            | Lupine           | L.l.  |
|               |                      | <i>Lycopersicon esculentum</i>                   | Tomato           | L.e.  |
|               |                      | <i>Oenothera berteriana</i>                      | Primrose         | O.b.  |
|               |                      | <i>Petunia hybrida</i>                           | Petunia          | P.h.  |
|               |                      | <i>Phaseolus vulgaris</i>                        | Bean             | P.v.  |
|               |                      | <i>Pisum sativum</i>                             | Pea              | P.s.  |
|               |                      | <i>Raphanus sativus</i>                          | Horseradish      | R.s.  |
|               |                      | <i>Solanum tuberosum</i>                         | Potato           | S.t.  |
|               |                      | <i>Vigna radiata</i>                             | Mung bean        | V.r.  |
|               | Liliopsida           | <i>Lolium multiflorum</i>                        | Italian ryegrass | L.m.  |
|               |                      | <i>Lophopyrum elongatum (Elytrigia elongata)</i> | Tall wheatgrass  | Lo.e. |
|               |                      | <i>Oryza sativa</i>                              | Rice             | O.s.  |
|               |                      | <i>Secale cereale</i>                            | Rye              | S.c.  |
|               |                      | <i>Sorghum bicolor</i>                           | Sorghum          | S.b.  |
|               |                      | <i>Sorghum vulgare</i>                           | Sorghum          | S.v.  |
|               |                      | <i>Triticum aestivum</i>                         | Wheat            | T.a.  |
|               |                      | <i>Zea mays</i>                                  | Maize            | Z.m.  |
|               | <b>Coniferophyta</b> |                                                  |                  |       |
|               | Coniferopsida        | <i>Larix leptoeuropaea</i>                       | Larch            | La.l. |
|               | <b>Chlorophyta</b>   |                                                  |                  |       |
|               | Chlorophyceae        | <i>Chlamydomonas eugametos</i>                   |                  | C.e.  |
|               |                      | <i>Chlamydomonas reinhardtii</i>                 |                  | C.r.  |
|               |                      | <i>Chlorogonium elongatum</i>                    |                  | Ch.e. |
|               |                      | <i>Scenedesmus obliquus</i>                      |                  | S.o.  |
|               | Pedinophyceae        | <i>Pedinomonas minor</i>                         |                  | P.m.  |
|               | Prasinophyceae       | <i>Platymonas subcordiformis</i>                 |                  | Pl.s. |
|               |                      | <i>Nephroselmis olivacea</i>                     |                  | N.o.  |
|               | Trebouxiophyceae     | <i>Prototheca wickerhamii</i>                    |                  | P.w.  |
| Rhodophytae   |                      |                                                  |                  |       |
|               | Bangiophyceae        | <i>Cyanidioschyzon merolae</i>                   |                  | C.m.  |
|               |                      | <i>Cyanidium caldarium</i>                       |                  | Cy.c. |
|               |                      | <i>Porphyra purpurea</i>                         |                  | P.p.  |
|               | Florideophyceae      | <i>Chondrus crispus</i>                          | Carrageen        | C.c.  |
| Stramenopiles |                      |                                                  |                  |       |
|               | Chrysophyceae        | <i>Chrysodidymus synuroideus</i>                 |                  | C.s.  |
|               | Phaeophyceae         | <i>Pilayella littoralis</i>                      |                  | Pl.   |

**Table S2.** Taxonomic groups present in the PLMitRNA database

---

|                |                                                              |
|----------------|--------------------------------------------------------------|
| 1.             | Viridiplantae (Green plants)                                 |
| 1.1.           | Streptophyta                                                 |
| 1.1.1.         | Embryophyta (Higher plants, Land plants) Bryophyta           |
| 1.1.1.1.1.     | Marchantiopsida                                              |
| 1.1.1.2.       | Tracheophyta (Vascular plants)                               |
| 1.1.1.2.1.     | Spermatophyta (Seed plants)                                  |
| 1.1.1.2.1.1.   | Coniferophyta                                                |
| 1.1.1.2.1.1.1. | Coniferopsida                                                |
| 1.1.1.2.1.2.   | Magnoliophyta = Angiospermae (Angiosperms, Flowering plants) |
| 1.1.1.2.1.2.1. | Liliopsida = Monocotyledonae (Monocots, Monocotyledons)      |
| 1.1.1.2.1.2.2. | Magnoliopsida = Dicotyledonae (Dicots, Dicotyledons)         |
| 1.2            | Chlorophyta (Green algae)                                    |
| 1.2.1          | Chlorophyceae                                                |
| 1.2.2          | Pedinophyceae                                                |
| 1.2.3          | Prasinophyceae                                               |
| 1.2.4          | Trebouxiophyceae                                             |
| 2.             | Rhodophytae (Red algae)                                      |
| 2.1            | Bangiophyceae                                                |
| 2.2            | Florideophyceae                                              |
| 3.             | Stramenopiles (Heterokonts)                                  |
| 3.1.           | Chrysophyceae = Chrysophyta (Golden algae)                   |
| 3.2.           | Phaeophyceae/Xantophyceae = Phaeophyta/Xanthophyta           |

---
